# Supplementary material for: Self-assembly and photoactivation of blue luminescent CsPbBr3 mesocrystals synthesized at ambient temperature
Source: Royal Society of Chemistry journal article supplement (doi:10.1039/c7tc05505f), 2018-01-01
Supplement: c7tc05505f1.pdf [file c7tc05505f1.pdf]

Supporting Information for

**Self-Assembly and Photoactivation of Blue Luminescent CsPbBr<sub>3</sub> Mesocrystals**

**Synthesized at Ambient Temperature**

Xiaoming Fu,<sup>ac</sup> Chi Zhang,<sup>a</sup> Zhiwei Peng,<sup>b</sup> Yong Xia,<sup>a</sup> Jianbing Zhang,<sup>a</sup> Wei Luo,<sup>a</sup> Rui Zhan,<sup>a</sup> Honglang Li,<sup>\*d</sup> YuHuang Wang,<sup>\*b</sup> and Daoli Zhang<sup>\*ab</sup>

**Contents**

|                                                                                                                                                       |   |
|-------------------------------------------------------------------------------------------------------------------------------------------------------|---|
| Fig S1. Optical properties of CsPbBr <sub>3</sub> mesocrystals washed different cycle with acetone solvent.....                                       | 2 |
| Fig S2. Temporal evolutions of emission spectrum, PLQY and position of PL peak before and after purification of CsPbBr <sub>3</sub> mesocrystals..... | 3 |

<sup>a</sup> School of Optical and Electronic Information, Huazhong University of Science and Technology, 1037 Luoyu Road, Hongshan District, Wuhan City, Hubei Province, 430074, P. R. China. E-mail: [zhang\\_daoli@hust.edu.cn](mailto:zhang_daoli@hust.edu.cn)

<sup>b</sup> Department of Chemistry and Biochemistry, University of Maryland, 8051 Regent Drive, College Park, MD 20742, USA. E-mail: [yhw@umd.edu](mailto:yhw@umd.edu)

<sup>c</sup> School of Physics, Communication and Electronics, Jiangxi Normal University, 99 Ziyang Avenues, Nanchang City, Jiangxi Province, 330022, P. R. China.

<sup>d</sup> Institute of Acoustics, Chinese Academy of Sciences, 21 North 4<sup>th</sup> Ring Road, Haidian District, Beijing, 100190, P. R. China. E-mail: [hl@mail.ioa.ac.cn](mailto:hl@mail.ioa.ac.cn)

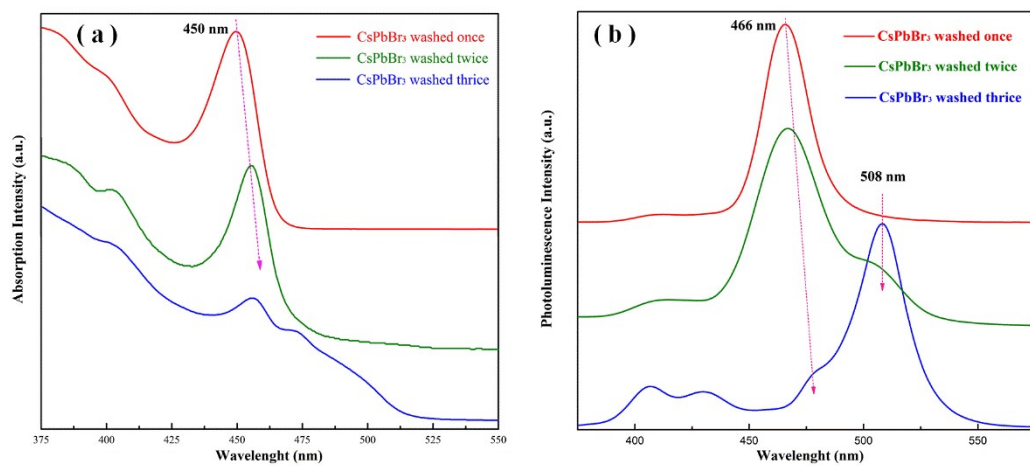

**Fig S1.** Optical properties of CsPbBr<sub>3</sub> mesocrystals washed different cycle with acetone solvent. (a) Absorbance curves. (b) PL emission spectrum.

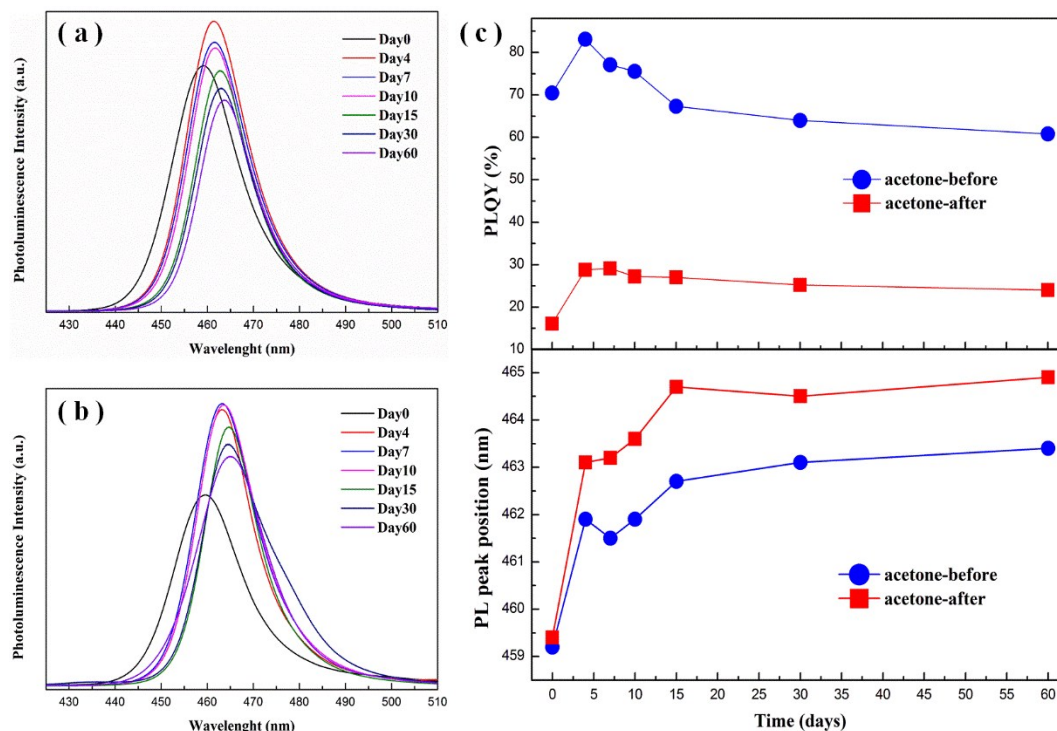

**Fig S2.** Temporal evolution of emission spectra of CsPbBr<sub>3</sub> mesocrystals stored in air for 60 days before (a) and after (b) purification by adding acetone. (c) The PLQY and position of PL peak as a function of time. The samples were exposed to room light at ambient temperature.
